# Supplementary material for: The synergetic effects of Ti3C2 MXene and Pt as co-catalysts for highly efficient photocatalytic hydrogen evolution over g-C3N4
Source: Royal Society of Chemistry journal article supplement (doi:10.1039/c8cp01123k), 2018-01-01
Supplement: c8cp01123k1.pdf [file c8cp01123k1.pdf]

Supporting Information

**The synergetic effect of  $\text{Ti}_3\text{C}_2$  MXene and Pt as co-catalysts for highly efficient photocatalytic hydrogen evolution over  $\text{g-C}_3\text{N}_4$**

Xiaoqiang An,<sup>a</sup> Wei Wang,<sup>b</sup> Jiangpeng Wang,<sup>b</sup> Haozhi Duan,<sup>b</sup> Jintao Shi,<sup>b</sup> Xuelian Yu<sup>b,\*</sup>

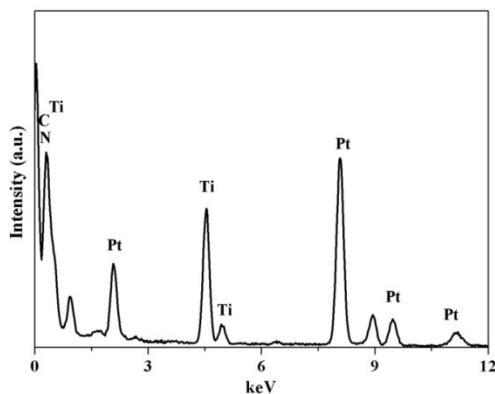

**Figure S1** EDS spectrum of  $\text{g-C}_3\text{N}_4/\text{Ti}_3\text{C}_2/\text{Pt}$  photocatalysts.

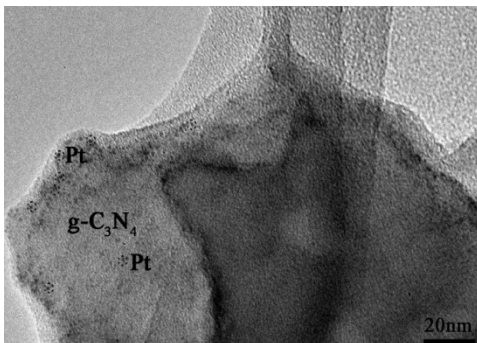

**Figure S2** TEM image of  $\text{g-C}_3\text{N}_4$  modified with Pt nanoclusters.

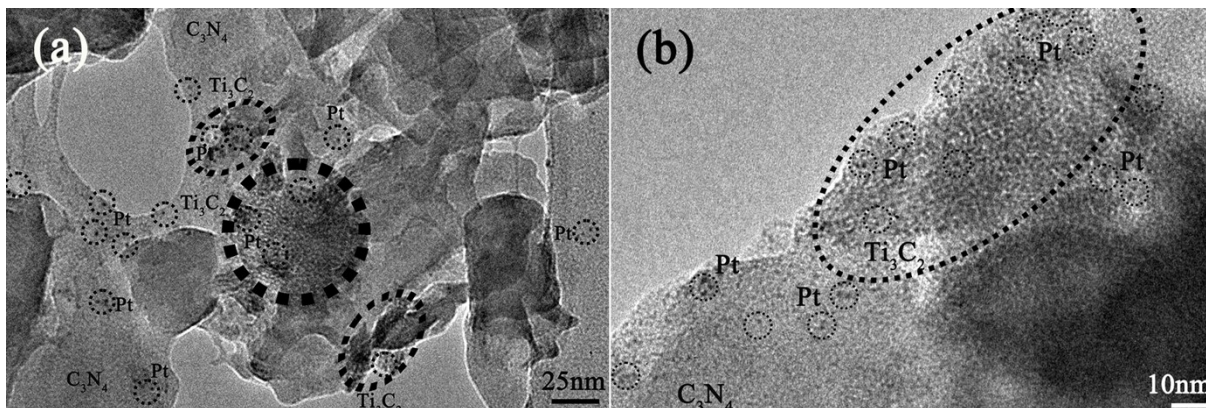

**Figure S3** TEM image of  $\text{g-C}_3\text{N}_4/\text{Ti}_3\text{C}_2/\text{Pt}$  photocatalysts..

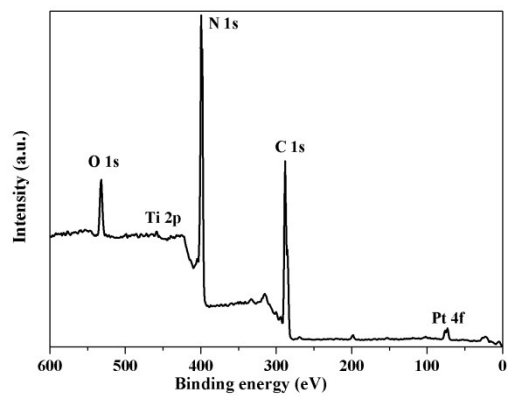

**Figure S4** Survey XPS spectrum of g-C<sub>3</sub>N<sub>4</sub>/Ti<sub>3</sub>C<sub>2</sub>/Pt photocatalysts.

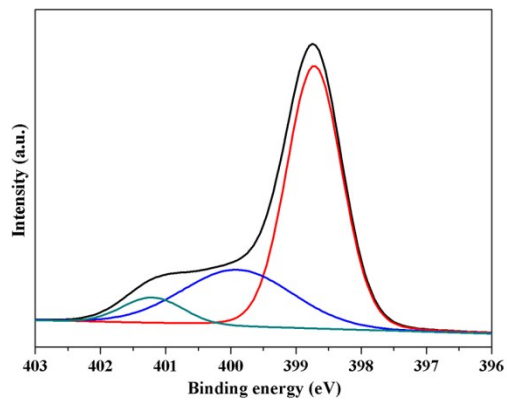

**Figure S5** N 1s spectrum of g-C<sub>3</sub>N<sub>4</sub>.

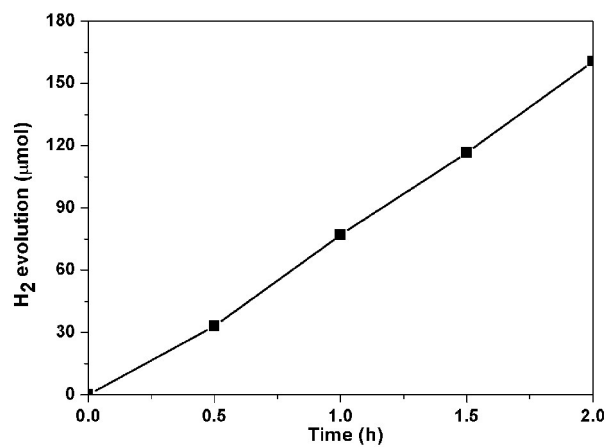

**Figure S6** H<sub>2</sub> evolution over g-C<sub>3</sub>N<sub>4</sub>/Ti<sub>3</sub>C<sub>2</sub>/Pt under visible light irradiation ( $\lambda > 420$  nm).

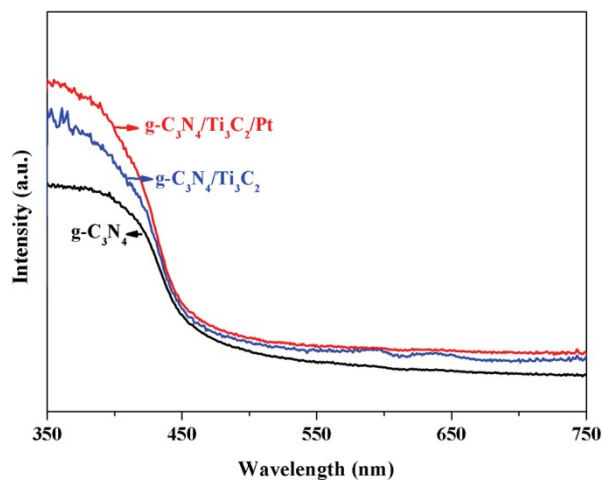

**Figure S7** DRS spectra of  $g\text{-C}_3\text{N}_4$ ,  $g\text{-C}_3\text{N}_4/\text{Ti}_3\text{C}_2$  and  $g\text{-C}_3\text{N}_4/\text{Ti}_3\text{C}_2/\text{Pt}$  photocatalysts.

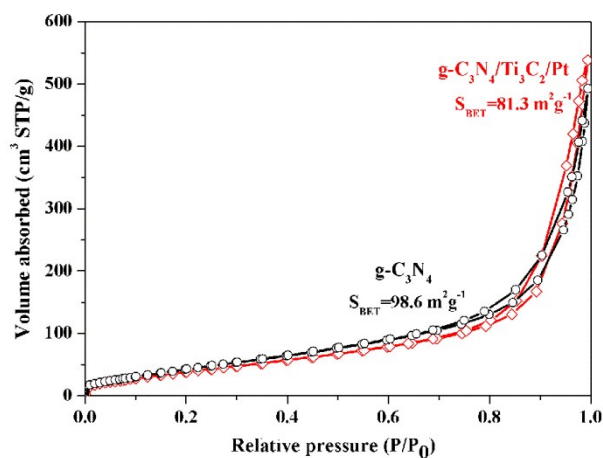

**Figure S8**  $\text{N}_2$  adsorption isotherms of  $g\text{-C}_3\text{N}_4$  and  $g\text{-C}_3\text{N}_4/\text{Ti}_3\text{C}_2/\text{Pt}$  photocatalysts.

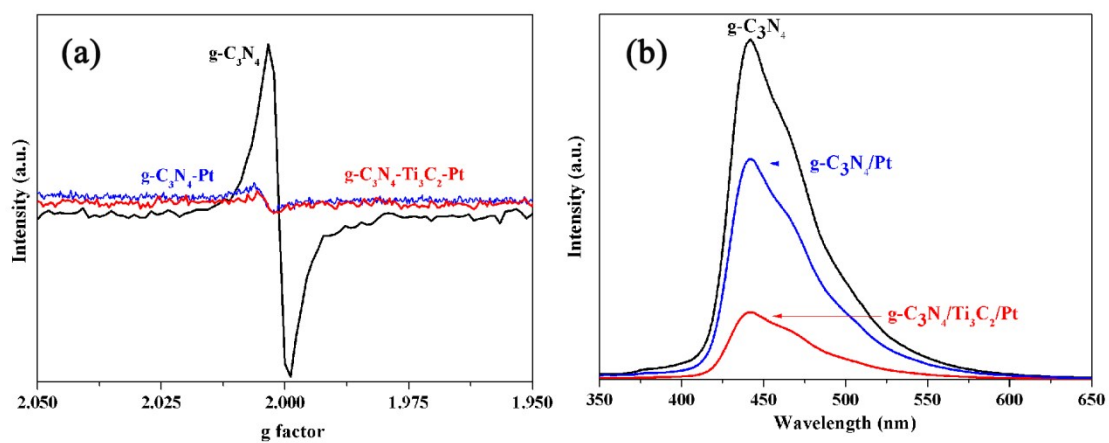

**Figure S9** (a) ESR spectra of  $g\text{-C}_3\text{N}_4$ ,  $g\text{-C}_3\text{N}_4/\text{Pt}$  and  $g\text{-C}_3\text{N}_4/\text{Ti}_3\text{C}_2/\text{Pt}$ ; (b) PL spectra of  $g\text{-C}_3\text{N}_4$ ,  $g\text{-C}_3\text{N}_4/\text{Pt}$  and  $g\text{-C}_3\text{N}_4/\text{Ti}_3\text{C}_2/\text{Pt}$ .

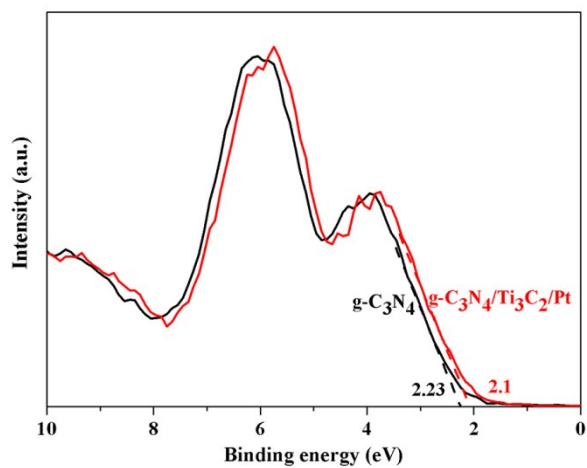

**Figure S10** N 1s spectrum of g-C<sub>3</sub>N<sub>4</sub>.

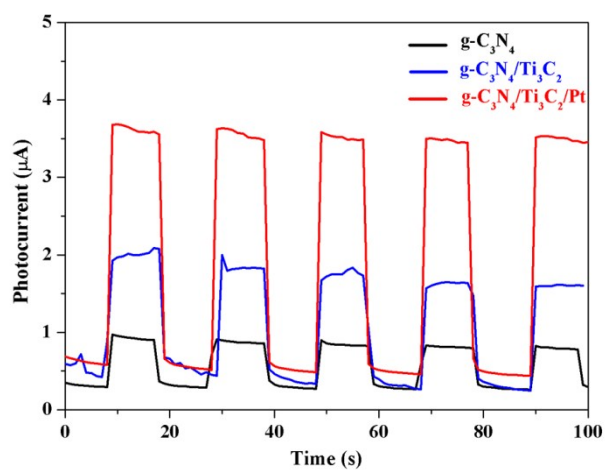

**Figure S11** Transient photocurrent response spectra of g-C<sub>3</sub>N<sub>4</sub>, g-C<sub>3</sub>N<sub>4</sub>/Ti<sub>3</sub>C<sub>2</sub> and g-C<sub>3</sub>N<sub>4</sub>/Ti<sub>3</sub>C<sub>2</sub>/Pt under visible light irradiation.

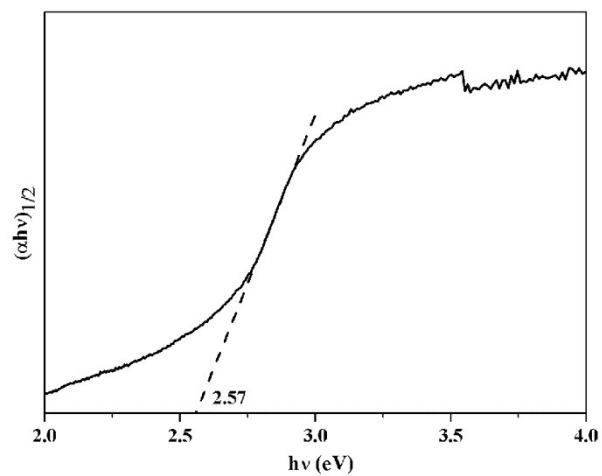

**Figure S12** The plots of  $(\alpha h\nu)^{1/2}$  versus  $h\nu$  of g-C<sub>3</sub>N<sub>4</sub>.

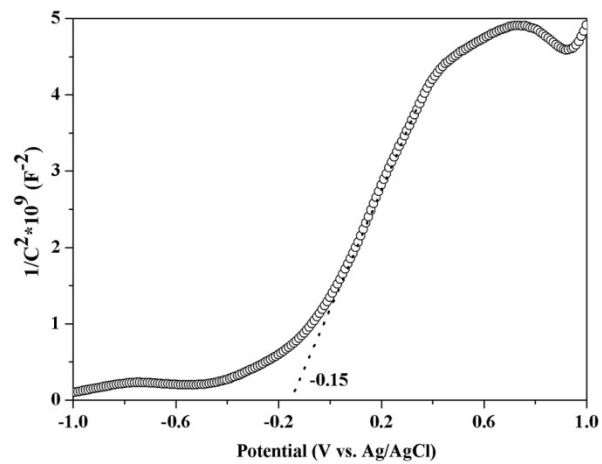

**Figure S13** Mott-schottky plot of  $\text{Ti}_3\text{C}_2$  Mxene.

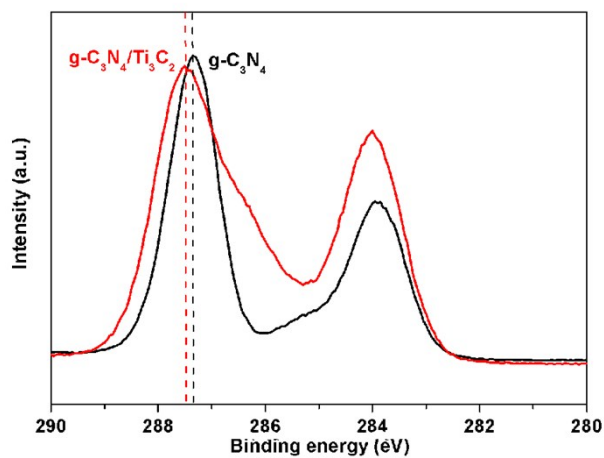

**Figure S14** C 1s XPS spectra of  $\text{g-C}_3\text{N}_4$  and  $\text{g-C}_3\text{N}_4/\text{Ti}_3\text{C}_2$ .

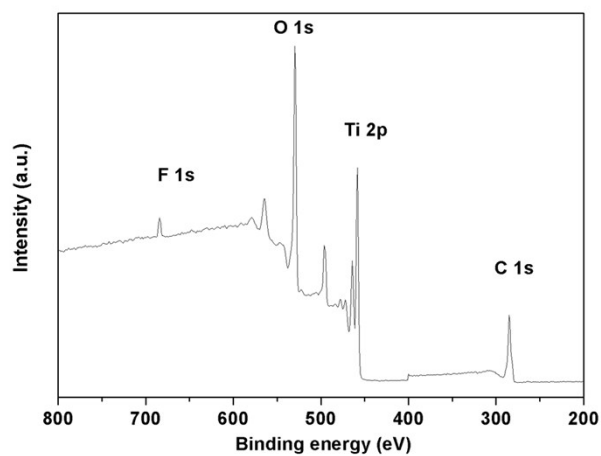

**Figure S15** Survey XPS spectrum of Ti<sub>3</sub>C<sub>2</sub> nanoparticles.

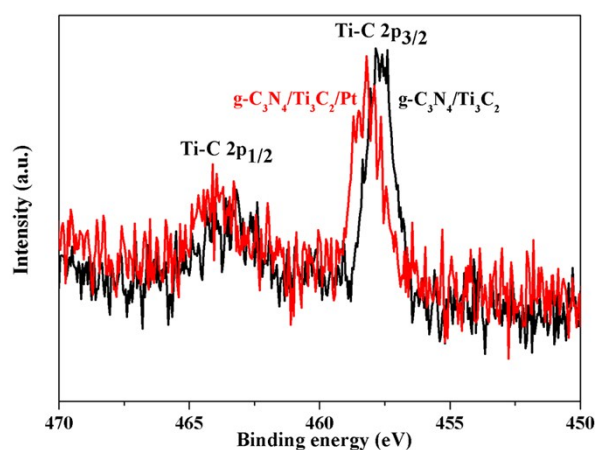

**Figure S16** Ti 2p XPS of g-C<sub>3</sub>N<sub>4</sub>/Ti<sub>3</sub>C<sub>2</sub> and g-C<sub>3</sub>N<sub>4</sub>/Ti<sub>3</sub>C<sub>2</sub>/Pt.

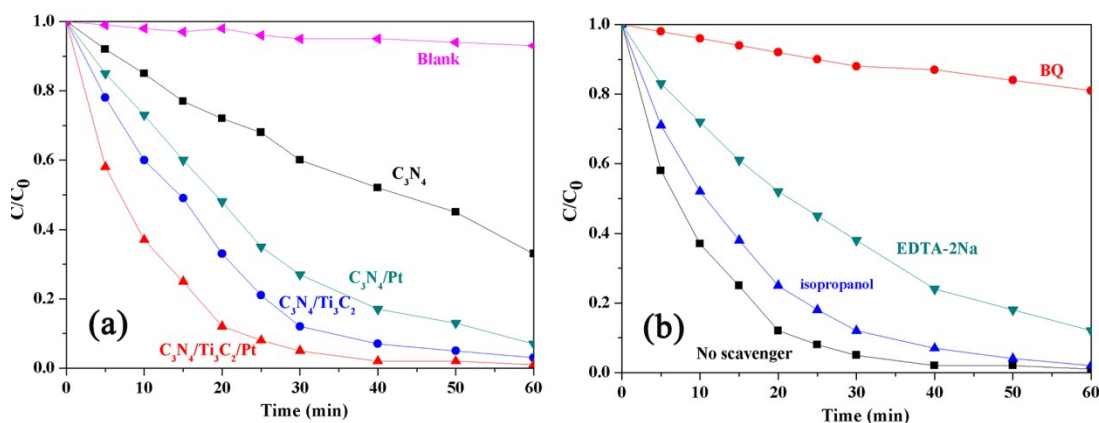

**Figure S17** (a) Photodegradation of methyl orange over different photocatalysts; (b) Photodegradation of methyl orange over g-C<sub>3</sub>N<sub>4</sub>/Ti<sub>3</sub>C<sub>2</sub>/Pt, with the addition of h<sup>+</sup>, •OH and •O<sub>2</sub><sup>-</sup> scavengers.

**Table S1** Comparison of several g-C<sub>3</sub>N<sub>4</sub>-based photocatalysts reported for hydrogen production.

| Sample                                                            | Hydrogen evolution rate<br>μmol h <sup>-1</sup> | Hydrogen evolution rate<br>μmol h <sup>-1</sup> g <sup>-1</sup> | Efficiency      | Ref. |
|-------------------------------------------------------------------|-------------------------------------------------|-----------------------------------------------------------------|-----------------|------|
| Graphitic carbon/carbon<br>nitride                                | ≈23.75 μmol h <sup>-1</sup>                     | ≈475 μmol h <sup>-1</sup> g <sup>-1</sup>                       | /               | 1    |
| Au-C <sub>3</sub> N <sub>4</sub> -MoS <sub>2</sub>                | 52.5 μmol h <sup>-1</sup>                       | 1050 μmol h <sup>-1</sup> g <sup>-1</sup>                       | /               | 2    |
| g-C <sub>3</sub> N <sub>4</sub> /SrTa <sub>2</sub> O <sub>6</sub> | 37.2 μmol h <sup>-1</sup>                       | 744 μmol h <sup>-1</sup> g <sup>-1</sup>                        | 2.62% at 420 nm | 3    |
| Ni <sub>2</sub> P/g-C <sub>3</sub> N <sub>4</sub>                 | 14.5 μmol h <sup>-1</sup>                       | 362.4 μmol h <sup>-1</sup> g <sup>-1</sup>                      | 1.8% at 420 nm  | 4    |
| P-doped g-C <sub>3</sub> N <sub>4</sub>                           | 57 μmol h <sup>-1</sup>                         | 570 μmol h <sup>-1</sup> g <sup>-1</sup>                        | /               | 5    |
| C-TiO <sub>2</sub> /g-C <sub>3</sub> N <sub>4</sub>               | /                                               | 1145.6 μmol h <sup>-1</sup> g <sup>-1</sup>                     | 6.2% at 420 nm  | 6    |
| NiCoP@NiCo-Pi/g-C <sub>3</sub> N <sub>4</sub>                     | 26.71 μmol h <sup>-1</sup>                      | 534.2 μmol h <sup>-1</sup> g <sup>-1</sup>                      | 2.9% at 420 nm  | 7    |

|                                                                                    |                               |                                                |                       |                  |
|------------------------------------------------------------------------------------|-------------------------------|------------------------------------------------|-----------------------|------------------|
| I-doped g-C <sub>3</sub> N <sub>4</sub>                                            | 44.5 μmol h <sup>-1</sup>     | 890 μmol h <sup>-1</sup> g <sup>-1</sup>       | 3.0% at 420 nm        | 8                |
| Au cluster-NP/C <sub>3</sub> N <sub>4</sub>                                        | /                             | 230 μmol h <sup>-1</sup> g <sup>-1</sup>       | 1.7% at 550 nm        | 9                |
| P-doped g-C <sub>3</sub> N <sub>4</sub>                                            | 67 μmol h <sup>-1</sup>       | 670 μmol h <sup>-1</sup> g <sup>-1</sup>       | 5.68% at 420 nm       | 10               |
| g-C <sub>3</sub> N <sub>4</sub> /Co <sub>2</sub> P/K <sub>2</sub> HPO <sub>4</sub> | 27.81 μmol h <sup>-1</sup>    | 556.2 μmol h <sup>-1</sup> g <sup>-1</sup>     | /                     | 11               |
| <b>g-C<sub>3</sub>N<sub>4</sub>/Ti<sub>3</sub>C<sub>2</sub>/Pt</b>                 | <b>77 μmol h<sup>-1</sup></b> | <b>2100 mmol h<sup>-1</sup> g<sup>-1</sup></b> | <b>3.1% at 420 nm</b> | <b>This work</b> |

<sup>a</sup> Light source: λ>420 nm

## References:

1. X. An, Y. Caob, Q. Liu, L. Chen, Z. Lin, Y. Zhou, Z. Zhang, J. Long, X. Wang, *Appl. Catal. A-General*, 2017, 546, 30–35.
2. W. Liu, B. Liang, Y. Ma, Y. Liu, A. Zhu, P. Tan, X. Xiong, J. Pan, *J. Colloid Interf. Sci.*, 2017, 508, 559–566.
3. S. Adhikari, Z. Hood, H. Wang, R. Peng, A. Krall, H. Li, V. Chen, K. More, Z. Wu, S. Geyer, A. Lachgar, *Appl. Catal. B-Environ.*, 2017, 217, 448–458.
4. W. Wang, T. An, G. Li, D. Xia, H. Zhao, J. Yu, P. Wong, *Appl. Catal. B-Environ.*, 2017, 217, 570–580.
5. S. Guo, Y. Tang, Y. Xie, C. Tian, Q. Feng, W. Zhou, B. Jiang, *Appl. Catal. B-Environ.*, 2017, 218, 664–671.
6. C. Yang, J. Qin, Z. Xue, M. Ma, X. Zhang, R. Liu, *Nano Energy*, 2017, 41, 1–9.
7. Z. Qin, Y. Chen, Z. Huang, Ji. Su and L. Guo, *J. Mater. Chem. A*, 2017, 5, 19025-19035.
8. Q. Han, C. Hu, F. Zhao, Z. Zhang, N. Chen and L. Qu, *J. Mater. Chem. A*, 2015, 3, 4612.
9. W. Cheng, H. Su, F. Tang, W. Che, Y. Huang, X. Zheng, T. Yao, J. Liu, F. Hu, Y. Jiang, Q. Liu and S. Wei, *J. Mater. Chem. A*, 2017, 5, 19649.
10. S. Guo, Z. Deng, M. Li, B. Jiang, C. Tian, Q. Pan and H. Fu, *Angew. Chem. Int. Ed.* 2016, 55, 1830 – 1834.
11. R. Shen, J. Xie, H. Zhang, A. Zhang, X. Chen and X. Li, *ACS Sustainable Chem. Eng.*, 2018, 6, 816–826.
